# Supplementary material for: Vacuolin-1 inhibits endosomal trafficking and metastasis via CapZβ
Source: PubMed Central journal article supplement (PMC7946642; doi:10.1038/s41388-021-01662-3), 2021-02-09
Supplement: 41388_2021_1662_MOESM4_ESM.pdf [file 41388_2021_1662_MOESM4_ESM.pdf]

In accordance with Springer Nature Authorship Policy we agree to change the authors of the manuscript as indicated below.

**NAME OF JOURNAL:** Oncogene

**TITLE OF MANUSCRIPT:** Vacuolin-1 inhibits endosomal trafficking and metastasis via CapZ $\beta$

**MANUSCRIPT NUMBER:** ONC-2020-01275

**CORRESPONDING AUTHORS NAME:** Yue Jianbo

**PREVIOUS AUTHOR NAMES:**

Zuodong Ye, Dawei Wang, Yunjiao He, Jingting Yu, Yingying Lu, Wenjie Wei, Chang Chen, Liangren Zhang, Hongmin Zhang, Jianbo Yue

**UPDATED AUTHOR NAMES:**

Zuodong Ye, Dawei Wang, Yingying Lu, Yunjiao He, Jingting Yu, Wenjie Wei, Chang Chen, Rui Wang, Minh Le, Liang Zhang, Liangren Zhang, William C. Cho, Mengsu Yang, Hongmin Zhang, Jianbo Yue

**CHANGE TO AUTHOR LIST:**

add Rui Wang, Liang Zhang, Minh Le, William C. Cho, Mengsu Yang

| Print Name  | Signature          | Date       |
|-------------|--------------------|------------|
| Zuodong Ye  | <i>Ye Zuodong</i>  | 20200928   |
| Dawei Wang  | <i>Wang Dawei</i>  | 20200929   |
| Yingying Lu | <i>Lu Yingying</i> | 26.09.2020 |
| Yunjiao He  | <i>He Yunjiao</i>  | 26.09.2020 |
| Jingting Yu | <i>Jingting Yu</i> | 27.09.2020 |
| Wenjie Wei  | <i>Wei Wenjie</i>  | 28.09.2020 |
| Chang Chen  | <i>Chang Chen</i>  | 28.09.2020 |
| Rui Wang    | <i>Rui Wang</i>    | 28.09.2020 |
