# Supplementary material for: Vacuolin-1 inhibits endosomal trafficking and metastasis via CapZβ
Source: PubMed Central journal article supplement (PMC7946642; doi:10.1038/s41388-021-01662-3), 2021-02-09
Supplement: 41388_2021_1662_MOESM5_ESM.pdf [file 41388_2021_1662_MOESM5_ESM.pdf]

In accordance with Springer Nature Authorship Policy we agree to change the authors of the manuscript as indicated below.

NAME OF JOURNAL: Oncogene

TITLE OF MANUSCRIPT: Vacuolin-1 inhibits endosomal trafficking and metastasis via CapZ $\beta$

MANUSCRIPT NUMBER: ONC-2020-01275

CORRESPONDING AUTHORS NAME: Yue Jianbo

PREVIOUS AUTHOR NAMES:

Zuodong Ye, Dawei Wang, Yunjiao He, Jingting Yu, Yingying Lu, Wenjie Wei, Chang Chen, Liangren Zhang, Hongmin Zhang, Jianbo Yue

UPDATED AUTHOR NAMES:

Zuodong Ye, Dawei Wang, Yingying Lu, Yunjiao He, Jingting Yu, Wenjie Wei, Chang Chen, Rui Wang, Minh Le, Liang Zhang, Liangren Zhang, William C. Cho, Mengsu Yang, Hongmin Zhang, Jianbo Yue

CHANGE TO AUTHOR LIST:

add Rui Wang, Liang Zhang, Minh Le, William C. Cho, Mengsu Yang

| Print Name     | Signature                                                                            | Date       |
|----------------|--------------------------------------------------------------------------------------|------------|
| Minh Le        |   | 13/11/2020 |
| Liang Zhang    |  | 29/09/2020 |
| Liangren Zhang |   | 29/09/2020 |
| William C. Cho |   | 28/09/2020 |
| Mengsu Yang    |  | 21/12/2020 |
| Hongmin Zhang  |   | 29/09/2020 |
| Jianbo Yue     |   | 29/09/2020 |
|                |                                                                                      |            |
